# Supplementary material for: Genetic Analysis of 252 Index Cases with Inherited Retinal Diseases Using a Panel of 351 Retinal Genes
Source: Preprints.org preprint supplement (doi:10.20944/preprints202406.0581.v1), 2024-06-11
Supplement: Supplementary file 2 [file supplementary]

## Sheet: Tabble S1
Table S1- identified gene and mutations in studied cases
Patient number	Phenotype	Gene	Inheritance pattern	Mut 1	Mut 2	Status (unsolved- 0, solved-1, probably solved- 2, possibly solved- 3)	Previous genetic analysis (0-yes by WES or gene panels, 1- no)
MOL0411-1	RP					0	0
MOL0440-1	LCA	ALMS1	AR	c.11544+3A>T, IVS16+3A>T	c.11544+3A>T, IVS16+3A>T	1	0
MOL0494-1	RP					0	0
MOL0531-1	LCA		`			0	0
MOL765-1	RP					0	0
MOL1047-1	USH2	ADGRV1	AR	c.335_336del, p.F112Yfs*29	c.335_336del, p.F112Yfs*29	1	1
MOL1116-2	RP	EYS	AR	Ex29del	Ex32-33del	1	0
MOL1134-1	LCA					0	0
MOL1241-3	Nystagmus					0	1
MOL1273-1	RP					0	0
MOL1423-1	RP	MT-ND6	Mitochondrial	c.133A>G, p.N45D	NA	2	0
MOL1431-1	RD					0	0
MOL1435-1	CRD					0	0
MOL1437-1	RP	WDR19	AR	c.1460T>C, p.F487S	c.3532C>T, p.R1178W	2	0
MOL1438-1	RP					0	0
MOL1439-1	RP					0	0
MOL1447-1	CRD					0	0
MOL1453-1	Retinoschisis					0	0
MOL1455-1	RP					0	0
MOL1462-1	RP					0	0
MOL1470-1	RP					0	0
MOL1476-1	CRD	HGSNAT	AR	c.370A>T, p.R124W	c.370A>T, p.R124W	1	0
MOL1478-1	RD					0	0
MOL1479-1	RP					0	0
MOL1489-1	RP					3	0
MOL1492-1	RP	MT-TN	Mitochondrial	m.5703G>A, n.27C>T	NA	1	0
MOL1515-1	RP					0	0
MOL1517-1	RP	IMPG1	AD	c.1736T>C, p.L579P	NA	1	0
MOL1525-1	RP					0	0
MOL1531-1	RP					0	0
MOL1534-1	RP	C21orf2	AR	c.1000-2A>G, IVS6-2A>G	c.1000-2A>G, IVS6-2A>G	1	0
MOL1537-1	MELAS	MT-TL1	Mitochondrial	m.3243A>G, n.14A>G	NA	1	0
MOL1539-1	RD					0	0
MOL1540-1	RP					3	0
MOL1544-1	RP					0	0
MOL1547-1	RP					3	0
MOL1561-1	RD					0	0
MOL1568-1	RP					0	0
MOL1574-1	LORD					0	0
MOL1578-1	RP	MVK	AR	c.83C>T, p.A28V	c.83C>T, p.A28V	2	0
MOL1590-1	CSNB					3	0
MOL1603-1	RD					0	0
MOL1606-1	CSNB- incomplete					0	0
MOL1614-1	RP					0	0
MOL1618-1	RP					0	0
MOL1620-1	RP					3	0
MOL1651-1	RP	CNGA1	AR	c.(299+1_300-1)_(557+1_558-1)del, Ex7-9del	c.959C>T, p.S320F	1	0
MOL1671-1	RP					0	0
MOL1673-1	RP					3	0
MOL1686-1	RP					0	0
MOL1693-1	CSNB					0	0
MOL1694-1	RP					0	0
MOL1705-1	CRD					0	0
MOL1721-1	RP	MT-CO2	Mitochondrial	m.7887G>C, p.G101A	NA	2	0
MOL1722-1	foveal hypoplasia					0	0
MOL1727-1	CRD					0	0
MOL1732-1	RP					0	0
MOL1733-1	RP					0	0
MOL1740-1	CSNB					0	0
MOL1743-1	CRD					0	0
MOL1760-1	RP	EYS	AR	Ex1del	Ex1del	1	0
MOL1766-1	SLS					0	0
MOL1770-1	RD	ABCA4	AR	c.5116G>T, p.V1706L	c.5116G>T, p.V1706L	2	0
MOL1771-1	RP	Mitochondrial	Mitochondrial	m.8468_13447del	NA	1	0
MOL1798-1	RP	ABCA4	AR	c.1938-619A>G, IVS13-619A>G	c.1938-619A>G, IVS13-619A>G	2	0
MOL1808-1	CSNB	TRPM1	AR	Ex2-10dup	c.1720A>G, p.K574E	2	1
MOL1821-1	RP					0	0
MOL1839-1	CSNB					0	0
MOL1845-1	RP					0	0
MOL1847-1	RP					0	0
MOL1855-1	RP	RPGR	XL dominant	c.778+5G>A, IVS7+5G>A	NA	1	0
MOL1860-1	Foveal hypoplasia					0	0
MOL1869-1	STGD					0	1
MOL1871-1	RP					0	0
MOL1883-1	RP					0	0
MOL1890-1	foveal hypoplasia					0	0
MOL1901-1	USH2					0	0
MOL1903-1	RP					0	0
MOL1909-1	RP					0	0
MOL1918-1	RP					0	0
MOL1927-1	LORD					0	0
MOL1929-1	RD					0	0
MOL1937-1	Bietti					0	0
MOL1940-1	RP					0	0
MOL1947-1	RP					0	0
MOL1948-1	RP					0	0
MOL1953-1	RP					0	0
MOL1963-3	RP	RDH12	AR	c.377C>T, p.A126V	c.377C>T, p.A126V	1	1
MOL1967-1	Retinoschisis	CHM	XL dominant	c.1163del, p.C388Sfs*21	NA	1	1
MOL1970-1	RP	C21orf2	AR	c.1028_1030dup, p.L343dup	c.1028_1030dup, p.L343dup	1	0
MOL1978-1	RP					0	0
MOL1979-1	RP					0	0
MOL1984-1	Chorioretinopathy- syndromic	KIF11	AD	c.1795del, p.H599Mfs*8	NA	1	1
MOL1988-1	CRD					0	1
MOL1989-1	RP					0	0
MOL1990-3	STGD	ABCA4	AR	c.5460+1G>A, IVS38+1G>A	c.5380G>C, p.A1794P	1	1
MOL1991-1	RD					0	1
MOL1996-1	CRD					0	1
MOL1998-1	RP					0	0
MOL2002-1	RP	MAK	AR	c.1297_8ins353, p.K433Rfs*31	c.1297_8ins353, p.K433Rfs*31	1	0
MOL2004-1	RP	MAK	AR	c.1297_8ins353, p.K433Rfs*31	c.1297_8ins353, p.K433Rfs*31	1	0
MOL2008-1	Oguchi	SAG	AR	c.874C>T, p.R292*	c.874C>T, p.R292*	1	1
MOL2018-1	USH2	ADGRV1	AR	c.12125del, p.M4042Rfs*15	c.12125del, p.M4042Rfs*15	1	0
MOL2021-1	USH	CEP78	AR	c.534delT, p.K179Rfs*10	c.534delT, p.K179Rfs*10	1	0
MOL2024-1	CRD	ABCA4 and CFAP418 (C8ORF37)	AR	c.3292C>T, p.R1098C and Gene del	c.3292C>T, p.R1098C and Gene del	1	1
MOL2042-1	RP					0	0
MOL2045-1	USH	USH2A	AR	c.5776+1G>A, IVS28+1G>A	c.5776+1G>A, IVS28+1G>A	1	1
MOL2049-1	Maculopathy	ABCA4	AR	c.[5056G>A;5882G>A], p.[V1686M;G1961E]	c.(768+1_769-1)_(1554+1_1555-1)dup, Ex7-11dup	1	1
MOL2050-1	Maculopathy	EYS	AR	c.8218_8219delCA, p.H2740Yfs*27	c.8218_8219delCA, p.H2740Yfs*27	1	1
MOL2057-1	RP					0	0
MOL2058-1	RP					0	0
MOL2061-1	RP	MERTK	AR	Gene del	c.1958T>C, p.L653P	1	0
MOL2062-1	RP	C21orf2	AR	c.96+1del, IVS2+1del	c.96+1del, IVS2+1del	1	0
MOL2067-1	RP					0	0
MOL2075-1	STGD	PRPH2	AD	c.515G>A, p.R172Q	NA	1	1
MOL2078-1	CSNB	TRPM1	AR	c.2684G>A, p.W895*	c.2684G>A, p.W895*	1	1
MOL2079-1	Congenital Disorder of Glycosylation	SRD5A3	AR	c.484C>T, p.Q162*	c.484C>T, p.Q162*	1	1
MOL2080-1	RP	PDE6B	AR	c.428C>A, p.A143D	c.428C>A, p.A143D	1	1
MOL2082-1	RP	MAK	AR	c.1297_8ins353, p.K433Rfs*31	c.1297_8ins353, p.K433Rfs*31	1	1
MOL2083-1	RP	FAM161A	AR	c.1355_6delCA, p.T452Sfs*3	c.1751G>A, p.R584K	1	1
MOL2084-1	RP					3	1
MOL2086-1	RP	MAK	AR	c.1297_8ins353, p.K433Rfs*31	c.1297_8ins353, p.K433Rfs*31	1	1
MOL2092-1	ACHM	CNGB3	AR	c.1055+2T>A, IVS9+2T>A	c.1055+2T>A, IVS9+2T>A	1	1
MOL2093-1	RP					3	1
MOL2095-1	RP					0	1
MOL2097-1	CRD	CACNA1F	XL	c.1546C>T, p.R516W	NA	2	1
MOL2099-1	USH	ARSG	AR	c.283C>T, p.R95W	c.283C>T, p.R95W	1	1
MOL2101-1	Chorioretinopathy- syndromic	KIF11	AD	c.247C>T, p.R83*	NA	2	1
MOL2102-1	RP	RP1	AD	c.2167G>T, p.G723*	NA	1	1
MOL2103-1	RP	PDE6G	AR	c.187+1G>T, IVS3+1G>T	c.187+1G>T, IVS3+1G>T	1	1
MOL2113-1	MELAS	MT-TL1	Mitochondrial	m.3243A>G, n.14A>G	NA	1	1
MOL2117-1	RP					3	1
MOL2120-1	Maculopathy	RP1L1	AR	c.1591dupG, p.A531fs	c.1591dupG, p.A531fs	1	1
MOL2123-1	CSNB	NYX	XL	c.1086C>A, p.C362*	NA	1	1
MOL2124-1	RP	C1QTNF5	AD	c.145C>T, p.R49C	NA	2	1
MOL2125-1	RP	EYS	AR	Ex9del	Ex9del	1	1
MOL2128-1	RP	MFSD8	AR	c.719C>G, p.S240*	c.1010G>A, p.R337H	1	1
MOL2129-1	RP	CNGA1	AR	c.524del, p.K175Rfs*92	c.524del, p.K175Rfs*92	1	1
MOL2130-1	USH2	USH2A	AR	c.5776+1G>A, IVS28+1G>A	c.5776+1G>A, IVS28+1G>A	1	1
MOL2132-1	ACHM					0	1
MOL2134-1	CRD					0	1
MOL2136-1	RP	CACNA1F	XL	c.1219T>C, p.W407R	NA	1	1
MOL2138-1	LCA					0	1
MOL2139-1	RP	PDE6A	AR	c.1270A>C, p.T424P	c.2125G>A, p.E709K	1	1
MOL2142-1	RP	EYS	AR	c.4361_4362delinsAG, p.S1454*	Ex34del	1	1
MOL2143-1	CHM					3	1
MOL2145-1	CSNB	RBP3	AR	c.832_834delTTC, p.Phe278del	c.832_834delTTC, p.Phe278del	1	1
MOL2147-1	RP	HGSNAT	AR	c.1843G>A, p.A615T	c.1843G>A, p.A615T	1	1
MOL2148-1	RP	CACNA1F	XL	c.3927del, p.F1309fs	NA	1	1
MOL2154-1	USH	USH2A	AR	c.820C>T, p.R274*	c.802G>A, p.G268R	1	1
MOL2155-1	RP	CNGB1	AR	c.2957A>T, p.N986I	c.2957A>T, p.N986I	1	1
MOL2156-1	RP					0	1
MOL2159-1	RP	USH2A	AR	c.2276G>T, p.C759F	c.1481A>G, p.Y494C	1	1
MOL2161-1	Maculopathy					0	1
MOL2162-1	RD					0	1
MOL2163-1	PD					0	1
MOL2164-1	nystagmus					0	1
MOL2166-1	RP	ABCA4	AR	c.[1622T>C;3113C>T], p.[L541P;A1038V]	c.[1622T>C;3113C>T], p.[L541P;A1038V]	1	1
MOL2167-1	CSNB	TRPM1	AR	c.3763C>T, p.R1255*	c.2430dup, p.Q811Tfs*12	1	1
MOL2168-1	USH1	USH1G	AR	c.469dup, p.H157Pfs*199	c.469dup, p.H157Pfs*199	1	1
MOL2169-1	CSNB	NYX	XL	c.350T>A, p.L117Q	NA	1	1
MOL2170-1	RP	FAM161A	AR	c.1355_6delCA, p.T452Sfs*3	c.1355_6delCA, p.T452Sfs*3	1	1
MOL2172-1	BCM					0	1
MOL2173-1	CSNB	TRPM1	AR	c.880A>T, p.K294*	c.880A>T, p.K294*	1	1
MOL2174-1	USH1	PCDH15	AR	c.1934del, p.G645Efs*4	c.1934del, p.G645Efs*4	1	1
MOL2176-1	RP	FAM161A	AR	c.1355_6delCA, p.T452Sfs*3	c.1355_6delCA, p.T452Sfs*3	1	1
MOL2177-1	CSNB	TRPM1	AR	exon2-7del, chr15:31355203-31391647del	exon2-7del, chr15:31355203-31391647del	1	1
MOL2180-1	BBS	BBS10	AR	c.310_311del, p.E104Kfs*7	c.310_311del, p.E104Kfs*7	1	1
MOL2181-1	STGD	PRPH2	AD	c.424C>T, p.R142W	NA	1	1
MOL2182-1	USH1	MYO7A	AR	c.700C>T, p.Q234*	c.700C>T, p.Q234*	1	1
MOL2183-1	MELAS	MT-TL1	Mitochondrial	m.3243A>G, n.14A>G	NA	1	1
MOL2184-1	LCA	CRB1	AR	c.3307G>A, p.G1103R	c.1510A>T, p.K504*	1	1
MOL2185-1	CRD	FAM161A	AR	c.1355_6delCA, p.T452Sfs*3	c.1355_6delCA, p.T452Sfs*3	1	1
MOL2186-1	CDSRR	KCNV2	AR	c.782C>A, p.A261D	c.782C>A, p.A261D	1	1
MOL2188-1	RP	RP2	XL	Ex4-5del	NA	1	1
MOL2189-1	Maculopathy					0	1
MOL2190-1	RP	RHO	AD	c.50C>T, p.T17M	NA	1	1
MOL2191-1	RD					0	1
MOL2192-1	RD	ABCA4	AR	c.4979C>T, p.P1660L	c.4979C>T, p.P1660L	1	1
MOL2194-1	RD	MT-ATP6	Mitochondrial	m.8609dup	NA	2	1
MOL2197-1	STGD	ABCA4	AR	c.4457C>T, p.P1486L	c.3050+5G>A, p.L973_H1017delinsF	1	1
MOL2198-1	CRD	C2orf71	AR	c.2950C>T, p.R984*	c.2175T>A, p.C725*	1	1
MOL2199-1	RP	EYS	AR	c.8218_8219delCA, p.H2740Yfs*27	c.8218_8219delCA, p.H2740Yfs*27	1	1
MOL2200-1	RP	RPGR	XL	c.619+4del, IVS6+4del	NA	1	1
MOL2201-1	ACHM	CNGA3	AR	c.829C>T, p.R277C	c.829C>T, p.R277C	1	1
MOL2202-1	RP	CACNA1F	XL	c.952-954delTTC, p.F318del	NA	1	1
MOL2206-1	RP	RDH12	AR	c.821T>C, p.L274P	c.821T>C, p.L274P	1	1
MOL2209-1	RP	DHDDS	AR	c.124A>G, p.K42E	c.124A>G, p.K42E	1	1
MOL2213-1	Best	BEST1	AD	c.887A>G, p.N296S	NA	1	1
MOL2214-1	RP	EYS	AR	c.1308C>A, p.C436*	c.403_423delinsCTTTT, p.T135Lfs*26	1	1
MOL2215-1	RP- syndromic	LAMA1	AR	c.2344C>T, p.R782*	c.2344C>T, p.R782*	1	1
MOL2216-1	Choroideremia	CHM	XL	c.98_99insAlu	NA	1	1
MOL2218-1	STGD	ABCA4	AR	c.5380G>C, p.A1794P	c.5380G>C, p.A1794P	1	1
MOL2219-1	RP	FAM161A	AR	c.1355_6delCA, p.T452Sfs*3	c.1355_6delCA, p.T452Sfs*3	1	1
MOL2220-1	RP	USH2A	AR	c.12448A>G, p.T4150A	c.12448A>G, p.T4150A	1	1
MOL2221-1	RP	EYS	AR	c.4361_4362delinsAG, p.S1454*	c.4361_4362delinsAG, p.S1454*	1	1
MOL2222-1	CSNB					0	1
MOL2223-1	Familial Drusen					0	1
MOL2224-1	RD					0	1
MOL2225-1	RP	CHM	XL	1166+1G>C, IVS8+1G>C	NA	1	1
MOL2226-1	RP	MAK	AR	c.1297_8ins353, p.K433Rfs*31	c.1297_8ins353, p.K433Rfs*31	1	1
MOL2227-1	maculpathy					0	1
MOL2228-1	maculpathy	CRX	AD	c.238G>A, p.E80K	NA	1	1
MOL2229-1	RP	USH2A	AR	c.2299del, p.E767Sfs*2	c.9880T>A, p.C3294S	1	1
MOL2230-1	Maculopathy					0	1
MOL2231-1	Maculopathy	ABCA4	AR	c.5882G>A, p.G1961E	c.286A>G, p.N96D	1	1
MOL2232-1	Maculopathy					0	1
MOL2233-1	RP	DHDDS	AR	c.124A>G, p.K42E	c.124A>G, p.K42E	1	1
MOL2234-1	Foveal Hypoplasia					0	1
MOL2235-1	CSNB	TRPM1	AR	c.880A>T, p.K294*	c.880A>T, p.K294*	1	1
MOL2236-1	Maculopathy					0	1
MOL2237-1	ACHM	CNGB3	AR	c.1148delC, p.T383Ifs*12	c.1148delC, p.T383Ifs*12	1	1
MOL2238-1	Maculopathy					0	1
MOL2239-1	USH	ADGRV1	AR	c.9679C>T, p.R3227*	c.11140C>T, p.Q3714*	1	1
MOL2240-1	RP	CRB1	AR	c.2171A>G, p.Y724C	c.3307G>A, p.G1103R	1	1
MOL2242-1	RD					0	1
MOL2243-1	LORD					0	1
MOL2244-1	RD					0	1
MOL2245-1	SLS	NPHP1	AR	Gene del	Gene del	1	1
MOL2246-1	Joubery syndrome	ARMC9	AR	c.51+5G>T, IVS2+5G>T	c.51+5G>T, IVS2+5G>T	1	1
MOL2247-1	RP	PDE6G	AR	c.187+1G>T, IVS3+1G>T	c.187+1G>T, IVS3+1G>T	1	1
MOL2248-1	RP	PDE6A	AR	c.2199+1G>C, IVS18+1G>C	c.2199+1G>C, IVS18+1G>C	1	1
MOL2250-1	RP	RDH12	AR	c.146C>T, p.T49M	c.377C>T, p.A126V	1	1
MOL2251-1	RP					0	1
MOL2252-1	STGD					0	1
MOL2253-1	USH1	USH1C	AR	c.496+1G>A, IVS5+1G>A	c.496+1G>A, IVS5+1G>A	1	1
MOL2254-1	Maculopathy	RP1L1	AD	c.133C>T, p.R45W	NA	1	1
MOL2255-1	CD					0	1
MOL2256-1	FA	RDH5	AR	c.160C>T, p.R54*	c.160C>T, p.R54*	1	1
MOL2257-1	RD					0	1
MOL2258-1	RP	C21orf2	AR	c.1028_1030dup, p.L343dup	c.1028_1030dup, p.L343dup	1	1
MOL2259-1	RP	RPGR	XL	c.2405_6delAG, p.E802Gfs*32	NA	1	1
MOL2260-1	USH2	ADGRV1	AR	c.6077dup, p.Y2026*	c.6077dup, p.Y2026*	1	1
MOL2261-1	PD					0	1
MOL2262-1	LHON	MT-ND1	Mitochondrial	c.154G>A, p.A52T	NA	1	1
MOL2263-1	USH2	USH2A	AR	c.12067-2A>G, IVS61-2A>G	c.12067-2A>G, IVS61-2A>G	1	1
MOL2264-1	RP	KCNJ13	AR	c.458C>T, p.T153I	c.458C>T, p.T153I	1	1
MOL2265-1	RP	FAM161A	AR	c.1355_6delCA, p.T452Sfs*3	c.1355_6delCA, p.T452Sfs*3	1	1
MOL2266-1	RP	RDH5	AR	c.160C>T, p.R54*	c.160C>T, p.R54*	1	1
MOL2267-1	FA	RDH5	AR	c.382G>A, p.D128N	c.382G>A, p.D128N	1	1
MOL2268-1	STGD					3	1
MOL2269-1	USH2	ADGRV1	AR	c.12125del, p.M4042Rfs*15	c.12125del, p.M4042Rfs*15	1	1
MOL2270-1	ACHM	CNGA3	AR	c.940_942delATC, p.I314del	c.940_942delATC, p.I314del	1	1
MOL2271-1	RP	IDH3A	AR	c.938T>C, p.M313T	c.2T>C, p.M1?	1	1
MOL2272-1	RP	CRB1	AR	c.2555T>C, p.I852T	c.4121-4130del, p.A1374Efs*20	1	1
MOL2274-1	BCM					3	1
MOL2275-1	USH1	MYO7A	AR	c.1190C>A, p.A397D	c.1190C>A, p.A397D	1	1
MOL2276-1	MELAS	MT-TL1	Mitochondrial	m.3243A>G, n.14A>G	NA	1	1
MOL2277-1	Maculopathy	ABCA4	AR	c.452T>C, p.I151T	c.5169C>G, p.Y1723*	1	1
MOL2278-1	RP	MAK	AR	c.1297_8ins353, p.K433Rfs*31	c.1297_8ins353, p.K433Rfs*31	1	1
MOL2281-1	CSNB	CACNA1F	XL	c.4518G>T, p.K1506N	NA	2	1
MOL2283-1	CSNB	GNAT1	AR	c.8del, p.A3Vfs*17	c.8del, p.A3Vfs*17	1	1
